# Supplementary material
Source: publisher figshare collection journal article supplement (https://tandf.figshare.com/ndownloader/files/13710812)
Supplement: Supplementary file 1 [file 13710812]

**Supplemental Table S1** The primers used in this study.

| Primer name | | Sequences |
| --- | --- | --- |
|  | RbcS conserved region |  |
|  | RbcSF1 | 5’-CGGTGCATGCAGGTGTTGGC-3’ |
|  | RbcSR1 | 5’-GGGCAGCTTCCACATGGTCC-3’ |
|  | 5’RACE |  |
|  | NgRbcS1-R | 5’-GCTGTGAGAGGTGGCAGGTACGAG-3’ |
|  | GgRbcS1-R | 5’-GATCCAGTTGTTCCGGATCAGGTAGTCG-3’ |
|  | 3’RACE |  |
|  | NgRbcS1-F | 5’-CTTGAGTTCAGCAAGGTCGGGTTCGTC-3’ |
|  | GgRbcS1-F | 5’-TGTTCCGTGAGAACTCCACTTCCCCG-3’ |
|  | Nested PCR for 3’RACE |  |
|  | 3’Ng-nested-F | 5’- TGTACCGTGAGAACAGCAGG-3’ |
|  | 3’Gg-nested-F | 5’- TGGACCATGTGGAAGCTGCC-3’ |
|  | RbcS cloning for transformation |  |
|  | NgRbcSCDS3’-F-Xba1 | 5’-GCGCTCTAGACTAACACTAGCTTGTAAGCC-3’ |
|  | NgRbcSCDS3’-R | 5’-ACAGAGCTGAACAAAGGAGG-3’ |
|  | GgRbcSCDS3’-F-Xba1 | 5’-GCGCTCTAGAAAGAAACCATGGCCCCCACC-3’ |
|  | GgRbcSCDS3’-R | 5’-CATATCATAGCCTGAGCTTTGC-3’ |

Extra nucleotides attached to introduce restriction sites are underlined.
